# Supplementary material
Source: publisher site journal article supplement (https://www.dovepress.com/article/402326)
Supplement: Supplementary file 1 [file get_supplementary_file.php]

Supplemental Information

to

**Asthma prevalence and phenotyping in the general population: the LEAD (Lung, hEart, sociAl, boDy) study.**

**Table S1**. Potential risk factors considered in the analysis.

| **Num.** | **Variable** | **Determination** | **Presentation** |
| --- | --- | --- | --- |
| 1 | Height | questionnaire | mean |
| 2 | Gender: male | questionnaire | percentage |
| 3 | Age, years | questionnaire | mean |
| 4 | Low socioeconomic status (SES) | questionnaire | percentage |
| 5 | Urban/rural living | questionnaire | percentage |
| 6 | FEV1 pre-BD, % predicted GLI | measurement | percentage |
| 7 | FEV1 post-BD, % predicted GLI | measurement | percentage |
| 8 | FVC pre-BD, % predicted GLI | measurement | percentage |
| 9 | FVC pre-BD, % predicted GLI | measurement | percentage |
| 10 | FEV1/FVC pre-BD, % predicted GLI | measurement | percentage |
| 11 | FEV1/FVC post-BD, % predicted GLI | measurement | percentage |
| 12 | Δ FEV1 in mL (FEV1 post-BD - FEV1 pre-BD) | measurement | mean |
| 13 | FEV1 change, % | measurement | mean |
| 14 | Reversibility (Difference post vs. pre-BD FEV1 ≥12%, and more than 0.2 L absolute; in participants < 19 years: ≥12%) | measurement | percentage |
| 15 | Never smoking | questionnaire | percentage |
| 16 | Former smoking | questionnaire | percentage |
| 17 | Current smoking | questionnaire | percentage |
| 18 | Smoker, ever | questionnaire | percentage |
| 19 | Pack years | questionnaire | mean |
| 20 | Heavy smoking (> 20 Pack years) | questionnaire | percentage |
| 21 | Second hand smoking | questionnaire | percentage |
| 22 | Maternal smoking during pregnancy | questionnaire | percentage |
| 23 | High level of traffic by day and/or night at home | questionnaire | percentage |
| 24 | Living on a main road/near a main vs. road/not near a main road | questionnaire | percentage |
| 27 | Positive Skin-Prick-Test (≥ 2 mm diameter, pos. control positive, neg. control negative, no antihistamine or corticosteroid last 24 hr) | measurement | percentage |
| 28 | Asthma (doctor`s diagnosed) | questionnaire | percentage |
| 30 | Chronic respiratory diseases (e.g. chronic bronchitis, emphysema, COPD; doctor`s diagnosed) | questionnaire | percentage |
| 31 | Allergy (allergy, atopy, eczema; doctor`s diagnosed) | questionnaire | percentage |
| 32 | Sinusitis/nasal polyps (ever) | questionnaire | percentage |
| 33 | Hypertension (doctor`s diagnosed; for ≥30 years) | questionnaire | percentage |
| 34 | Doctor’s diagnosed diabetes | questionnaire | percentage |
| 37 | Coughing | questionnaire | percentage |
| 38 | Sputum | questionnaire | percentage |
| 39 | Wheezing | questionnaire | percentage |
| 40 | Dyspnea (reduced walking speed vs. others of same age and/or need to pause when walking at individual speed or after short distance or time) | questionnaire | percentage |
| 41 | Parental Allergy | questionnaire | percentage |
| 42 | Waist circumference, cm | measurement | mean |
| 43 | Central obesity (<18yrs: waist-height-ratio≥0.5; ≥18yrs: waist circumference ≥88/102cm) | measurement | percentage |
| 44 | Lean mass index (LMI), kg/m2 | measurement | mean |
| 45 | Fat mass index (FMI), kg/m2 | measurement | mean |
| 46 | Visceral adipose tissue (VAT) mass, g | measurement | mean |
| 47 | VAT volume, mL | measurement | mean |
| 48 | VAT, z-score | measurement | mean |
| 52 | Eosinophil levels, blood, cells/uL | measurement | mean |
| 54 | blood hsCRP, mg/L | measurement | mean |
| 56 | Blood neutrophil granulocytes, cells/uL | measurement | mean |
| 58 | Adiposity/obesity, BMI > 30 kg/m2 or +2SD < 19 years of age | measurement | percentage |
| 59 | Atopy, ever | questionnaire | percentage |
| 61 | Asthma control test (ACT), categories (0-14 uncontrolled, 15-19 partly controlled, 20-25 controlled | questionnaire | percentage |

*Supplemental Table S2: Univariate analysis analysis in the LEAD study for control and asthma subjects, separated by age (<20 years, 20-60 years, and 60 or older) including anthropometrics, body composition, lung function, asthma medication, comorbidities, asthma symptoms, and inflammatory markers.*

| **Parameter** | **Control** | | | | | | **Current asthma** | | | | | | **p-value** | | |
| --- | --- | --- | --- | --- | --- | --- | --- | --- | --- | --- | --- | --- | --- | --- | --- |
| **<20 years, n=1406** | | **20-60 years, n=6008** | | **60+ years, n=2506** | | **<20 years, n=51** | | **20-60 years, n=310** | | **60+ years, n=131** | | **Ctl vs Asthma** | | |
| **Mean or %** | **SD** | **Mean or %** | **SD** | **Mean or %** | **SD** | **Mean or %** | **SD** | **Mean or %** | **SD** | **Mean or %** | **SD** | **<20** | **20-60** | **60+** |
| Male sex | 726 | 51.6 | 2824 | 47.0 | 1172 | 46.8 | 31 | 60.8 | 129 | 41.6 | 63 | 48.1 | ns | ns | ns |
| Age, years | 13.0 | 3.9 | 41.1 | 11.4 | 68.7 | 5.2 | 14.0 | 3.8 | 43.1 | 10.3 | 68.1 | 4.8 | ns | ** | ns |
| Height, cm | 153.8 | 18.6 | 171.8 | 9.4 | 167.4 | 9.2 | 159.5 | 17.0 | 170.5 | 9.1 | 167.0 | 9.4 | * | * | ns |
| Weight, kg | 48.0 | 18.1 | 74.8 | 16.4 | 78.1 | 15.0 | 54.9 | 17.1 | 76.4 | 16.2 | 78.6 | 15.2 | ** | ns | ns |
| BMI, kg/m2 | 19.5 | 4.0 | 25.3 | 4.7 | 27.8 | 4.6 | 21.1 | 4.0 | 26.3 | 5.2 | 28.2 | 5.0 | *** | **** | ns |
| Low SES | 229 | 16.3 | 512 | 8.5 | 50 | 2.0 | 10 | 19.6 | 31 | 10.0 | 2 | 1.5 | ns | ns | ns |
| Smoking habits and environment |  |  |  |  |  |  |  |  |  |  |  |  |  |  |  |
| Pack years | 0.1 | 0.6 | 7.9 | 14.4 | 13.9 | 23.2 | 0.1 | 0.6 | 9.1 | 17.6 | 17.0 | 29.9 | ns | ns | ns |
| Never smoker | 1313 | 93.4 | 2641 | 44.0 | 1129 | 45.1 | 48 | 94.1 | 138 | 44.5 | 64 | 48.9 | ns | ns | ns |
| Former smoker | 9 | 0.6 | 1711 | 28.5 | 1036 | 41.3 | 0 | 0.0 | 90 | 29.0 | 54 | 41.2 | ns | ns | ns |
| Current smoker | 84 | 6.0 | 1654 | 27.5 | 340 | 13.6 | 3 | 5.9 | 82 | 26.5 | 13 | 9.9 | ns | ns | ns |
| Heavy smoking | - |  | 897 | 14.9 | 669 | 26.7 | - | - | 49 | 15.8 | 37 | 28.2 | ns | ns | ns |
| SHS, ever | 303 | 21.6 | 3447 | 57.4 | 1696 | 67.7 | 12 | 23.5 | 203 | 65.5 | 93 | 71.0 | ns | ** | ns |
| MS during pregnancy | 139 | 9.9 | 269 | 4.5 | 34 | 1.4 | 7 | 13.7 | 30 | 9.7 | 3 | 2.3 | ns | **** | ns |
| Urban | 1244 | 88.5 | 5164 | 86.0 | 1929 | 77.0 | 47 | 92.2 | 259 | 83.5 | 112 | 85.5 | ns | ns | * |
| Asthma symptoms |  |  |  |  |  |  |  |  |  |  |  |  |  |  |  |
| Positive skin prick | 495 | 35.2 | 2337 | 38.9 | 629 | 25.1 | 44 | 86.3 | 234 | 75.5 | 53 | 40.5 | **** | **** | **** |
| Atopy | 81 | 5.8 | 557 | 9.3 | 182 | 7.3 | 6 | 11.8 | 54 | 17.4 | 20 | 15.3 | ns | **** | *** |
| Neurodermitis |  | 0.0 | 191 | 3.2 | 26 | 1.0 | 9 | 17.6 | 23 | 7.4 | 3 | 2.3 | **** | **** | ns |
| Allergy (diagnosis) | 251 | 17.9 | 1853 | 30.8 | 565 | 22.5 | 42 | 82.4 | 250 | 80.6 | 65 | 49.6 | **** | **** | **** |
| Nasal polyps | 20 | 1.4 | 77 | 1.3 | 36 | 1.4 | 4 | 7.8 | 13 | 4.2 | 7 | 5.3 | ** | **** | ** |
| Coughing | 74 | 5.3 | 634 | 10.6 | 396 | 15.8 | 13 | 25.5 | 103 | 33.2 | 64 | 48.9 | **** | **** | **** |
| Sputum | 41 | 2.9 | 529 | 8.8 | 252 | 10.1 | 9 | 17.6 | 97 | 31.3 | 58 | 44.3 | **** | **** | **** |
| Wheezing | 60 | 4.3 | 441 | 7.3 | 165 | 6.6 | 24 | 47.1 | 162 | 52.3 | 67 | 51.1 | **** | **** | **** |
| Dyspnea | 17 | 1.2 | 105 | 1.7 | 106 | 4.2 | 4 | 7.8 | 51 | 16.5 | 38 | 29.0 | **** | **** | **** |
| ACT, controlled | 2 | 0.1 | 0 | 0.0 | 1 | 0.0 | 24 | 58.5 | 200 | 77.2 | 54 | 68.4 | ns | **** | **** |
| ACT, partly controlled | 2 | 0.1 | 1 | 0.0 | 0 | 0.0 | 10 | 24.4 | 40 | 15.4 | 20 | 25.3 |
| ACT, uncontrolled | 3 | 0.2 | 45 | 0.7 | 15 | 0.6 | 7 | 17.1 | 19 | 7.3 | 5 | 6.3 |
| Lung function |  |  |  |  |  |  |  |  |  |  |  |  |  |  |  |
| FEV1 pre, L | 2.8 | 1.1 | 3.5 | 0.8 | 2.7 | 0.6 | 2.9 | 1.0 | 3.0 | 0.8 | 2.1 | 0.7 | ns | **** | **** |
| % pred, GLI | 97.9 | 11.9 | 97.8 | 12.0 | 101.0 | 16.9 | 92.6 | 15.0 | 87.5 | 14.9 | 79.9 | 21.0 | *** | **** | **** |
| FEV1 pre < LLN | 92 | 6.5 | 336 | 5.6 | 114 | 4.5 | 10 | 19.6 | 74 | 23.9 | 42 | 32.1 | **** | **** | **** |
| FEV1 post, L | 2.9 | 1.1 | 3.6 | 0.8 | 2.7 | 0.6 | 3.1 | 1.0 | 3.2 | 0.8 | 2.3 | 0.7 | ns | **** | **** |
| % pred, GLI | 100.9 | 12.2 | 100.4 | 11.9 | 103.9 | 16.5 | 98.3 | 13.2 | 92.9 | 13.9 | 85.5 | 21.1 | ns | **** | **** |
| FEV1 post < LLN | 71 | 5.0 | 206 | 3.4 | 75 | 3.0 | 6 | 11.8 | 42 | 13.5 | 31 | 23.7 | * | **** | **** |
| FVC pre, L | 3.2 | 1.2 | 4.4 | 1.0 | 3.5 | 0.8 | 3.5 | 1.2 | 4.2 | 1.0 | 3.1 | 0.9 | ns | **** | **** |
| % pred, GLI | 98.1 | 11.5 | 99.6 | 11.5 | 101.8 | 15.8 | 97.2 | 12.2 | 96.4 | 12.6 | 91.6 | 18.0 | ns | **** | **** |
| FVC pre < LLN | 85 | 6.0 | 225 | 3.7 | 77 | 3.1 | 5 | 9.8 | 24 | 7.7 | 24 | 18.3 | ns | **** | **** |
| FVC post, L | 3.2 | 1.2 | 4.4 | 1.0 | 3.5 | 0.8 | 3.6 | 1.2 | 4.2 | 1.0 | 3.3 | 0.9 | * | **** | *** |
| % pred, GLI | 98.9 | 11.6 | 99.7 | 11.5 | 102.7 | 15.3 | 99.0 | 11.4 | 98.3 | 12.0 | 95.1 | 17.3 | ns | * | **** |
| FVC post < LLN | 91 | 6.5 | 215 | 3.6 | 52 | 2.1 | 3 | 5.9 | 18 | 5.8 | 18 | 13.7 | ns | * | **** |
| FEV1/FVC pre, % | 87.2 | 6.8 | 79.8 | 6.6 | 76.4 | 6.5 | 82.5 | 9.0 | 73.5 | 9.1 | 66.7 | 9.2 | **** | **** | **** |
| % pred, GLI | 99.3 | 7.6 | 97.8 | 7.3 | 98.7 | 8.3 | 94.4 | 10.0 | 90.3 | 10.6 | 86.0 | 11.7 | **** | **** | **** |
| FEV1/FVC pre < LLN | 74 | 5.3 | 354 | 5.9 | 101 | 4.0 | 9 | 17.6 | 99 | 31.9 | 50 | 38.2 | **** | **** | **** |
| FEV1/FVC post, % | 89.1 | 6.2 | 82.0 | 6.2 | 78.0 | 6.4 | 86.1 | 7.2 | 76.6 | 8.5 | 68.9 | 9.5 | *** | **** | **** |
| % pred, GLI | 101.4 | 6.9 | 100.4 | 6.8 | 100.6 | 8.1 | 98.6 | 7.8 | 94.1 | 9.7 | 88.8 | 12.0 | ** | **** | **** |
| FEV1/FVC post < LLN | 46 | 3.3 | 206 | 3.4 | 77 | 3.1 | 5 | 9.8 | 59 | 19.0 | 41 | 31.3 | * | **** | **** |
| Delta FEV1 (ml) | 82.4 | 145.3 | 97.0 | 134.3 | 76.4 | 119.0 | 175.1 | 177.5 | 187.3 | 170.8 | 146.3 | 158.9 | **** | **** | **** |
| FEV1 change (%) | 3.2 | 5.8 | 2.9 | 4.1 | 3.2 | 5.0 | 7.0 | 7.7 | 6.7 | 6.9 | 7.9 | 8.7 | **** | **** | **** |
| Reversibility | 73 | 5.2 | 115 | 1.9 | 77 | 3.1 | 9 | 17.6 | 46 | 14.8 | 29 | 22.1 | **** | **** | **** |
| History |  |  |  |  |  |  |  |  |  |  |  |  |  |  |  |
| Asthma family | 172 | 12.2 | 619 | 10.3 | 189 | 7.5 | 18 | 1.3 | 85 | 27.4 | 26 | 19.8 | **** | **** | **** |
| Parental asthma (diagnosed) | 67 | 4.8 | 236 | 3.9 | 62 | 2.5 | 6 | 11.8 | 34 | 11.0 | 10 | 7.6 | * | **** | *** |
| Body composition |  |  |  |  |  |  |  |  |  |  |  |  |  |  |  |
| Waist circumference (cm) | 71.4 | 11.7 | 91.1 | 13.3 | 100.6 | 12.4 | 76.8 | 12.0 | 93.7 | 14.1 | 102.1 | 12.5 | *** | *** | ns |
| Adiposity | 41 | 2.9 | 859 | 14.3 | 675 | 26.9 | 2 | 3.9 | 62 | 20.0 | 40 | 30.5 | ns | ** | ns |
| Central obesity | 244 | 17.4 | 1994 | 33.2 | 1635 | 65.2 | 12 | 23.5 | 132 | 42.6 | 88 | 67.2 | ns | **** | ns |
| VAT mass, g | 193.9 | 229.0 | 735.6 | 715.5 | 1492.0 | 886.9 | 202.8 | 243.6 | 833.4 | 766.8 | 1661.3 | 957.7 | ns | * | * |
| VAT volume, mL | 207.1 | 242.4 | 791.4 | 749.7 | 1571.4 | 920.5 | 252.5 | 278.3 | 874.1 | 796.6 | 1777.6 | 1011.5 | ns | ns | * |
| VAT mass, z-score | -0.3 | 1.2 | -0.1 | 1.1 | 0.0 | 1.0 | -0.3 | 1.6 | 0.0 | 1.1 | 0.2 | 1.1 | ns | ns | * |
| High VAT mass | 2 | 0.1 | 115 | 1.9 | 42 | 1.7 | 0 | 0.0 | 7 | 2.3 | 3 | 2.3 | ns | ns | ns |
| FMI, kg/m2 | 5.7 | 2.6 | 8.3 | 3.4 | 10.4 | 3.5 | 6.7 | 2.9 | 9.2 | 4.0 | 10.9 | 3.7 | * | **** | ns |
| FMI, z-score | 0.0 | 1.0 | 0.0 | 1.0 | 0.0 | 1.0 | 0.3 | 0.9 | 0.1 | 1.1 | 0.1 | 1.0 | * | ** | ns |
| High FMI | 334 | 23.8 | 1319 | 22.0 | 591 | 23.6 | 17 | 33.3 | 94 | 30.3 | 42 | 32.1 | ns | **** | * |
| LMI, kg/m2 | 13.2 | 2.3 | 16.1 | 2.4 | 16.5 | 2.1 | 13.8 | 2.2 | 16.2 | 2.3 | 16.6 | 2.3 | ns | ns | ns |
| LMI, z-score | 0.0 | 1.0 | 0.0 | 1.0 | 0.0 | 1.0 | 0.1 | 1.0 | 0.1 | 1.0 | 0.0 | 1.1 | ns | ns | ns |
| Low LMI | 35 | 2.5 | 135 | 2.2 | 50 | 2.0 | 2 | 3.9 | 6 | 1.9 | 5 | 3.8 | ns | ns | ns |
| Inflammatory markers |  |  |  |  |  |  |  |  |  |  |  |  |  |  |  |
| hsCRP, mg/L | 1.1 | 3.0 | 1.9 | 3.7 | 2.8 | 5.4 | 1.7 | 4.0 | 2.5 | 5.0 | 2.7 | 2.8 | ns | ** | ns |
| HbA1c, % | 5.0 | 0.3 | 5.2 | 0.5 | 5.6 | 0.6 | 5.0 | 0.2 | 5.2 | 0.5 | 5.6 | 0.6 | ns | * | ns |
| Fibrinogen, g/L | 2.8 | 0.6 | 3.0 | 0.7 | 3.5 | 0.7 | 2.9 | 0.6 | 3.2 | 0.8 | 3.5 | 0.7 | ns | **** | ns |
| Neutrophil granulocytes, x10^3 cells/uL | 3.7 | 1.5 | 3.9 | 1.5 | 4.0 | 1.4 | 4.3 | 1.6 | 4.0 | 1.6 | 4.3 | 1.3 | ** | ns | * |
| Eosinophils (cells/uL) | 211.2 | 200.6 | 158.3 | 127.1 | 158.2 | 123.3 | 379.0 | 345.4 | 235.9 | 186.0 | 230.3 | 176.0 | **** | **** | **** |
| Medication |  |  |  |  |  |  |  |  |  |  |  |  |  |  |  |
| Antihistamine | 28 | 2.0 | 197 | 3.3 | 78 | 3.1 | 13 | 25.5 | 73 | 23.5 | 24 | 18.3 | **** | **** | **** |
| Asthma medication | 26 | 1.8 | 48 | 0.8 | 44 | 1.8 | 27 | 52.9 | 173 | 55.8 | 88 | 67.2 | **** | **** | **** |
| ICS | 7 | 0.5 | 21 | 0.3 | 22 | 0.9 | 13 | 25.5 | 126 | 40.6 | 76 | 58.0 | **** | **** | **** |
| Asthma medication with antihistamine | 52 | 3.7 | 232 | 3.9 | 114 | 4.5 | 34 | 66.7 | 185 | 59.7 | 94 | 71.8 | **** | **** | **** |

** p < 0.05, ** p < 0.01, *** p < 0.001, **** p < 0.0001. BMI: Body mass index; SES: socioeconomic status; SHS: secondhand smoking; MS: maternal smoking; ACT: asthma control test; FEV1: forced expiratory volume in 1 second; FVC: forced vital capacity; VAT: visceral adipose tissue; FMI: fat mass index; LMI: lean mass index; hsCRP: high-sensitivity C-reactive protein HbA1c: hemoglobin A1C; ICS: inhaled corticosteroids.*
